# Supplementary material for: Factors Associated With Prolonged Warm Ischemia Time Among Deceased Donor Kidney Transplant Recipients
Source: PubMed Central journal article supplement — Transplant Direct. 2018 Apr 18;4(5):e342. doi: 10.1097/TXD.0000000000000781 (PMC5959340; doi:10.1097/txd.0000000000000781), 2018-04-18
Supplement: txd-4-e342-s001.pdf [file txd-4-e342-s001.pdf]

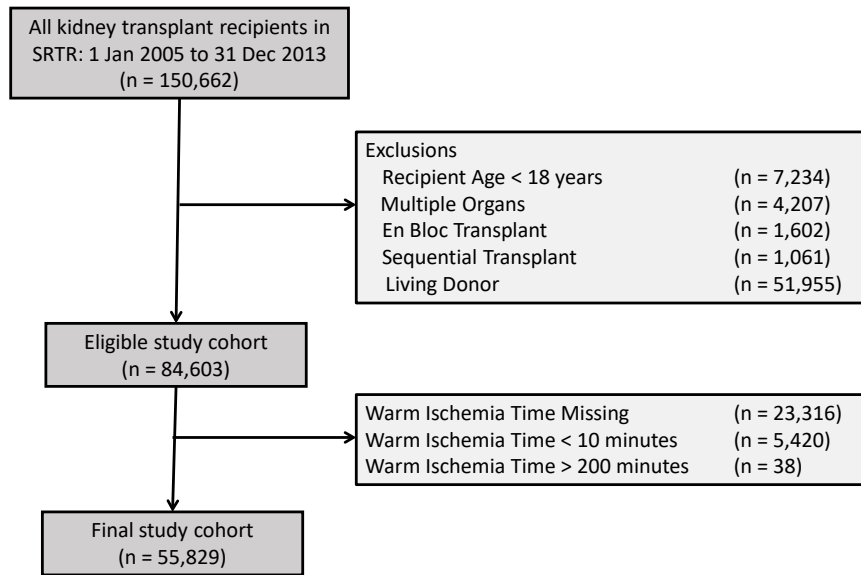

**Figure S1:** Cohort Derivation

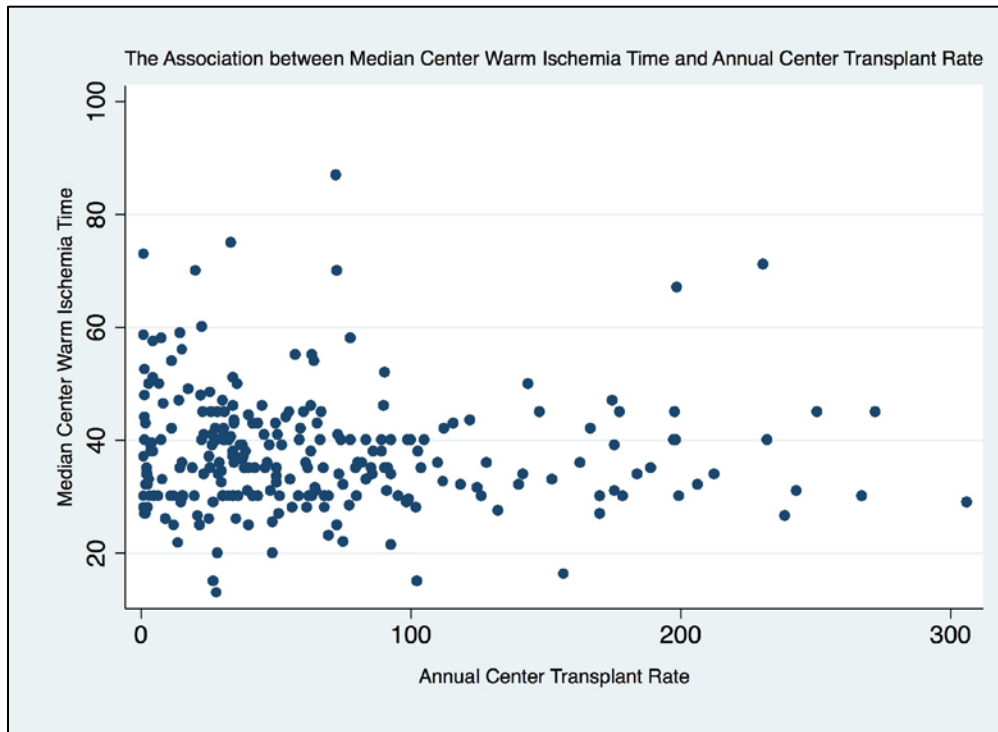

**Figure S2:** The Association between Median Center Warm Ischemia Time and Annual Center Transplant Rate

**Table S1:** Patient variables for those with WIT reported compared to those with missing WIT.

| Variable<br>N (%)                                                 | WIT reported<br>55,829 (66.0%) | WIT excluded<br>5,458 (6.5%) | WIT missing<br>23,316 (27.6%) |
|-------------------------------------------------------------------|--------------------------------|------------------------------|-------------------------------|
| <b>Donor Factors</b>                                              |                                |                              |                               |
| Age (y) mean +/- SD                                               | 39.4 +/- 15.7                  | 38.6 +/- 15.7                | 40.2 +/- 16.0                 |
| 18 to < 40                                                        | 21,283 (41.9%)                 | 2,143 (43.6%)                | 8,555 (40.2%)                 |
| 40 to < 60                                                        | 24,809 (48.8%)                 | 2,358 (47.9%)                | 10,446 (49.1%)                |
| 60+                                                               | 4,707 (9.3%)                   | 418 (8.5%)                   | 2,296 (10.8%)                 |
| DM                                                                | 3,953 (7.1%)                   | 378 (7.0%)                   | 1,806 (7.8%)                  |
| HTN                                                               | 15,890 (28.5%)                 | 1,486 (27.2%)                | 6,913 (29.7%)                 |
| Sex (Male)                                                        | 33,507 (60.0%)                 | 3,308 (60.6%)                | 14,019 (60.1%)                |
| BMI (kg/m <sup>2</sup> )                                          |                                |                              |                               |
| <18.5                                                             | 2,740 (4.9%)                   | 305 (5.6%)                   | 1,144 (4.9%)                  |
| 18.5-24.99                                                        | 19,684 (35.3%)                 | 1,865 (34.2%)                | 8,075 (34.6%)                 |
| 24.5-29.99                                                        | 17,632 (31.6%)                 | 1,738 (31.8%)                | 7,417 (31.8%)                 |
| 30.0-34.99                                                        | 9,133 (16.4%)                  | 924 (16.9%)                  | 3,874 (16.6%)                 |
| >35.0                                                             | 6,639 (11.9%)                  | 626 (11.5%)                  | 2,806 (12.0%)                 |
| Race                                                              |                                |                              |                               |
| White                                                             | 38,704 (69.3%)                 | 3,774 (69.2%)                | 16,080 (69.0%)                |
| Black                                                             | 7,962 (14.3%)                  | 672 (12.3%)                  | 3,082 (13.2%)                 |
| Other                                                             | 9,163 (16.4%)                  | 1,012 (18.5%)                | 4,154 (17.8%)                 |
| <b>Recipient Factors</b>                                          |                                |                              |                               |
| Age (y) mean +/- SD                                               | 53.0 +/- 13.1                  | 52.5 +/- 13.1                | 53.3 +/- 13.1                 |
| 18 to < 40                                                        | 9,905 (17.7%)                  | 1,000 (18.3%)                | 3,964 (17.0%)                 |
| 40 to < 60                                                        | 27,036 (48.4%)                 | 2,694 (49.4%)                | 11,311 (48.5%)                |
| 60+                                                               | 18,888 (33.8%)                 | 1,764 (32.3%)                | 8,041 (34.5%)                 |
| DM                                                                | 19,306 (34.6%)                 | 1,827 (33.4%)                | 8,358 (35.9%)                 |
| HTN                                                               | 45,321 (81.2%)                 | 4,403 (80.7%)                | 15,492 (66.4%)                |
| CAD                                                               | 3,952 (7.1%)                   | 291 (5.3%)                   | 1,234 (5.3%)                  |
| PVD                                                               | 2,416 (4.3%)                   | 236 (4.3%)                   | 812 (3.5%)                    |
| Sex (Male)                                                        | 33,885 (60.7%)                 | 3,329 (61.0%)                | 14,151 (60.7%)                |
| BMI (kg/m <sup>2</sup> )                                          |                                |                              |                               |
| <18.5                                                             | 1,215 (2.2%)                   | 164 (3.0%)                   | 494 (2.1%)                    |
| 18.5-24.99                                                        | 16,373 (29.3%)                 | 1,674 (30.7%)                | 6,652 (28.5%)                 |
| 24.5-29.99                                                        | 18,788 (33.7%)                 | 1,833 (33.6%)                | 7,959 (34.1%)                 |
| 30.0-34.99                                                        | 12,818 (23.0%)                 | 1,204 (22.1%)                | 5,354 (23.0%)                 |
| >35.0                                                             | 6,467 (11.6%)                  | 573 (10.5%)                  | 2,792 (12.0%)                 |
| Race                                                              |                                |                              |                               |
| White                                                             | 25,234 (45.2%)                 | 2,519 (46.2%)                | 10,526 (45.1%)                |
| Black                                                             | 18,371 (32.9%)                 | 1,557 (28.5%)                | 7,552 (32.4%)                 |
| Other                                                             | 12,224 (21.9%)                 | 1,382 (25.3%)                | 5,238 (22.5%)                 |
| ESRD                                                              |                                |                              |                               |
| GN                                                                | 12,346 (22.1%)                 | 1,171 (21.5%)                | 4,939 (21.2%)                 |
| DM                                                                | 14,736 (26.4%)                 | 1,413 (25.9%)                | 6,286 (27.0%)                 |
| PCKD                                                              | 4,757 (8.5%)                   | 475 (8.7%)                   | 1,932 (8.3%)                  |
| Other                                                             | 23,644 (42.4%)                 | 2,362 (43.3%)                | 9,997 (42.9%)                 |
| Dialysis vintage >1 year (v. <1 year)                             | 45,181 (80.9%)                 | 4,236 (77.6%)                | 18,555 (79.6%)                |
| Prior Kidney Transplant                                           | 7,170 (12.8%)                  | 712 (13.1%)                  | 3,254 (14.0%)                 |
| <b>Transplant Factors</b>                                         |                                |                              |                               |
| Era after 2009 (v. before)                                        | 43,510 (77.9%)                 | 4,261 (78.1%)                | 18,711 (80.3%)                |
| Donor WIT (min) mean +/- SD                                       | 18.0 +/- 15.0                  | 15.7 +/- 13.9                | 18.6 +/- 15.4                 |
| Center transplant rate (Deceased + Living) (per y) median +/- IQR | 98.3 IQR 61.1-170.1            | 89.2 IQR 55.3-175.6          | 99.3 IQR 64.8-178.6           |
| On pump (v. ice)                                                  | 9,239 (72.7%)                  | 551 (71.6%)                  | 3,597 (71.1%)                 |
| Cold Ischemic Time (h) mean +/- SD                                | 18.0 +/- 9.5                   | 16.4 +/- 8.1                 | 17.9 +/- 8.4                  |
| <12 (h)                                                           | 14,564 (26.1%)                 | 1,695 (31.1%)                | 5,184 (22.2%)                 |
| 12-24 (h)                                                         | 29,076 (52.1%)                 | 2,710 (49.7%)                | 10,775 (46.2%)                |
| >24 (h)                                                           | 11,758 (21.1%)                 | 993 (18.2%)                  | 4,630 (19.9%)                 |
| Transplant Side (Right)                                           | 26,619 (53.1%)                 | 2,872 (52.6%)                | 12,281 (52.7%)                |
| ECD                                                               | 9,404 (16.8%)                  | 783 (14.4%)                  | 4,347 (17.2%)                 |

**Missing data:** Recipient HTN 7.5%, recipient CAD 10.6%, recipient PVD 3.2%, ESRD 0.6%, CIT 0.8%, donor HTN 0.5%, dialysis vintage 0.9%, donor BMI 0.002%, recipient BMI 0.3%. *Diabetes mellitus (DM), hypertension (HTN), body mass index (BMI), coronary artery disease (CAD), peripheral vascular disease (PVD), end-stage renal disease (ESRD), glomerulonephritis (GN), polycystic kidney disease (PCKD), warm ischemia time (WIT), cold ischemia time (CIT), expanded criteria donor (ECD), donation after cardiac death (DCD).*

**Table S2:** Multivariable linear regression model for donor, recipient, and transplant variables associated with a prolonged *log-transformed* recipient warm ischemia time ( $\geq 30$  minutes) treating transplant center as a random effect.

| Variable                              | Beta-coefficient | 95% Confidence Interval |
|---------------------------------------|------------------|-------------------------|
| <b>Donor Factors</b>                  |                  |                         |
| Age (y)                               | Ref              | -                       |
| 18 to < 40                            | 0.0104           | 0.0013 – 0.0195         |
| 40 to < 60                            | 0.0084           | -0.0174 – 0.0342        |
| 60+                                   | 0.0163           | -0.0040 – 0.0365        |
| DM                                    | 0.0064           | -0.0084 – 0.0211        |
| HTN                                   | 0.0122           | 0.0046 – 0.0199         |
| Sex (Male)                            |                  |                         |
| BMI (kg/m <sup>2</sup> )              |                  |                         |
| <18.5                                 | -0.0054          | -0.0286 – 0.0178        |
| 18.5-24.99                            | Ref              | -                       |
| 24.5-29.99                            | 0.0076           | -0.0008 – 0.0160        |
| 30.0-34.99                            | 0.0173           | 0.0059 – 0.0286         |
| >35.0                                 | 0.0250           | 0.0083 – 0.0418         |
| Race                                  |                  |                         |
| White                                 | Ref              | -                       |
| Black                                 | -0.0177          | -0.0395 – 0.0041        |
| Other                                 | 0.0085           | -0.0284 – 0.0454        |
| <b>Recipient Factors</b>              |                  |                         |
| Age (y)                               | Ref              | -                       |
| 18 to < 40                            | 0.0035           | -0.0085 – 0.0155        |
| 40 to < 60                            | 0.0008           | -0.0192 – 0.0208        |
| 60+                                   | -0.0023          | -0.0209 – 0.0162        |
| DM                                    | 0.0267           | -0.0004 – 0.0537        |
| HTN                                   | 0.0190           | -0.0180 – 0.0559        |
| CAD                                   | 0.0267           | 0.0006 – 0.0528         |
| PVD                                   | 0.0073           | -0.0008 – 0.0154        |
| Sex (Male)                            |                  |                         |
| BMI (kg/m <sup>2</sup> )              |                  |                         |
| <18.5                                 | 0.0083           | -0.0155 – 0.0321        |
| 18.5-24.99                            | Ref              | -                       |
| 24.5-29.99                            | 0.0260           | 0.0158 – 0.0363         |
| 30.0-34.99                            | 0.0479           | 0.0326 – 0.0633         |
| >35.0                                 | 0.0848           | 0.0606 – 0.1090         |
| Race                                  |                  |                         |
| White                                 | Ref              | -                       |
| Black                                 | -0.0026          | -0.0341 – 0.0289        |
| Other                                 | -0.0048          | -0.0409 – 0.0314        |
| ESRD                                  |                  |                         |
| GN                                    | Ref              | -                       |
| DM                                    | 0.0325           | 0.0081 – 0.0570         |
| PCKD                                  | 0.0011           | -0.0134 – 0.0157        |
| Other                                 | 0.0071           | -0.0124 – 0.0267        |
| Dialysis vintage >1 year (v. <1 year) | 0.0247           | 0.0065 – 0.0430         |
| Prior Kidney Transplant               | 0.0394           | 0.0239 – 0.0550         |
| <b>Transplant Factors</b>             |                  |                         |
| Era after 2009 (v. before)            | 0.0586           | 0.0165 – 0.1006         |
| Cold Ischemic Time (h)                |                  |                         |
| <12                                   | Ref              | -                       |
| 12-24                                 | 0.0198           | -0.0058 – 0.0454        |
| >24                                   | 0.0827           | -0.0144 – 0.1798        |
| Transplant Side (Right)               | 0.0211           | 0.0122 – 0.0300         |
| ECD                                   | 0.0126           | -0.0062 – 0.0314        |
| DCD                                   | 0.0073           | -0.0317 – 0.0462        |

**Missing data:** Recipient HTN 7.5%, recipient CAD 10.6%, recipient PVD 3.2%, ESRD 0.6%, CIT 0.8%, donor HTN 0.5%, dialysis vintage 0.9%, donor BMI 0.002%, recipient BMI 0.3%. *Diabetes mellitus (DM)*, *hypertension (HTN)*, *body mass index (BMI)*, *coronary artery disease (CAD)*, *peripheral vascular disease (PVD)*, *end-stage renal disease (ESRD)*, *glomerulonephritis (GN)*, *polycystic kidney disease (PCKD)*, *warm ischemia time (WIT)*, *cold ischemia time (CIT)*, *expanded criteria donor (ECD)*, *donation after cardiac death (DCD)*.

**Table S3:** Multivariable logistic regression model for donor, recipient, and transplant variables associated with a prolonged recipient warm ischemia time ( $\geq 45$  minutes versus 10 to < 30 minutes)) treating transplant center as a random effect.

| Variable                              | Odd's Ratio | 95% Confidence Interval |
|---------------------------------------|-------------|-------------------------|
| <b>Donor Factors</b>                  |             |                         |
| Age (y)                               |             |                         |
| 18 to < 40                            | Ref         | -                       |
| 40 to < 60                            | 1.10        | 1.02 – 1.19             |
| 60+                                   | 1.05        | 0.88 – 1.26             |
| DM                                    | 1.15        | 1.00 – 1.31             |
| HTN                                   | 1.04        | 0.95 – 1.13             |
| Sex (Male)                            | 1.13        | 1.06 – 1.21             |
| BMI (kg/m <sup>2</sup> )              |             |                         |
| <18.5                                 | 0.99        | 0.78 – 1.25             |
| 18.5-24.99                            | Ref         | -                       |
| 24.5-29.99                            | 1.04        | 0.96 – 1.13             |
| 30.0-34.99                            | 1.07        | 0.97 – 1.18             |
| >35.0                                 | 1.14        | 1.01 – 1.27             |
| Race                                  |             |                         |
| White                                 | Ref         | -                       |
| Black                                 | 0.88        | 0.79 – 0.98             |
| Other                                 | 0.97        | 0.88 – 1.07             |
| <b>Recipient Factors</b>              |             |                         |
| Age (y)                               |             |                         |
| 18 to < 40                            | Ref         | -                       |
| 40 to < 60                            | 1.02        | 0.92 – 1.12             |
| 60+                                   | 1.05        | 0.94 – 1.17             |
| DM                                    | 1.07        | 0.94 – 1.22             |
| HTN                                   | 1.10        | 0.99 – 1.23             |
| CAD                                   | 1.03        | 0.90 – 1.18             |
| PVD                                   | 1.17        | 0.99 – 1.39             |
| Sex (Male)                            | 1.07        | 1.00 – 1.15             |
| BMI (kg/m <sup>2</sup> )              |             |                         |
| <18.5                                 | 1.23        | 0.98 – 1.55             |
| 18.5-24.99                            | Ref         | -                       |
| 24.5-29.99                            | 1.29        | 1.18 – 1.40             |
| 30.0-34.99                            | 1.59        | 1.45 – 1.75             |
| >35.0                                 | 1.98        | 1.76 – 2.23             |
| Race                                  |             |                         |
| White                                 | Ref         | -                       |
| Black                                 | 1.09        | 1.00 – 1.18             |
| Other                                 | 0.98        | 0.89 – 1.08             |
| ESRD                                  |             |                         |
| GN                                    | Ref         | -                       |
| DM                                    | 1.31        | 1.13 – 1.53             |
| PCKD                                  | 1.11        | 0.97 – 1.27             |
| Other                                 | 1.11        | 1.01 – 1.21             |
| Dialysis vintage >1 year (v. <1 year) | 1.07        | 0.98 – 1.16             |
| Prior Kidney Transplant               | 1.51        | 1.36 – 1.68             |
| <b>Transplant Factors</b>             |             |                         |
| Era after 2009 (v. before)            | 1.03        | 0.94 – 1.12             |
| CIT (h)                               |             |                         |
| <12                                   | Ref         | -                       |
| 12-24                                 | 1.26        | 1.16 – 1.36             |
| >24                                   | 1.34        | 1.20 – 1.50             |
| Transplant Side (Right)               | 1.21        | 1.13 – 1.29             |
| ECD                                   | 1.02        | 0.89 – 1.17             |
| DCD                                   | 0.94        | 0.85 – 1.04             |

**Missing data:** Recipient HTN 7.5%, recipient CAD 10.6%, recipient PVD 3.2%, ESRD 0.6%, CIT 0.8%, donor HTN 0.5%, dialysis vintage 0.9%, donor BMI 0.002%, recipient BMI 0.3%. *Diabetes mellitus (DM), hypertension (HTN), body mass index (BMI), coronary artery disease (CAD), peripheral vascular disease (PVD), end-stage renal disease (ESRD), glomerulonephritis (GN), polycystic kidney disease (PCKD), warm ischemia time (WIT), cold ischemia time (CIT), expanded criteria donor (ECD), donation after cardiac death (DCD).*

**Table S4:** Multivariable logistic regression model for donor, recipient, and transplant variables associated with a prolonged recipient warm ischemia time ( $\geq 30$  minutes) in centers with  $\geq 75\%$  reporting, treating transplant center as a random effect.

| Variable                              | Odd's Ratio | 95% Confidence Interval |
|---------------------------------------|-------------|-------------------------|
| <b>Donor Factors</b>                  |             |                         |
| Age (y)                               |             |                         |
| 18 to < 40                            | Ref         | -                       |
| 40 to < 60                            | 1.07        | 1.01 – 1.14             |
| 60+                                   | 1.03        | 0.89 – 1.19             |
| DM                                    | 1.07        | 0.96 – 1.19             |
| HTN                                   | 1.05        | 0.98 – 1.13             |
| Sex (Male)                            | 1.10        | 1.04 – 1.16             |
| BMI (kg/m <sup>2</sup> )              |             |                         |
| <18.5                                 | 1.21        | 1.01 – 1.45             |
| 18.5-24.99                            | Ref         | -                       |
| 24.5-29.99                            | 1.04        | 0.98 – 1.11             |
| 30.0-34.99                            | 1.01        | 0.94 – 1.10             |
| >35.0                                 | 1.08        | 0.99 – 1.19             |
| Race                                  |             |                         |
| White                                 | Ref         | -                       |
| Black                                 | 0.97        | 0.89 – 1.05             |
| Other                                 | 0.99        | 0.92 – 1.07             |
| <b>Recipient Factors</b>              |             |                         |
| Age (y)                               |             |                         |
| 18 to < 40                            | Ref         | -                       |
| 40 to < 60                            | 0.98        | 0.91 – 1.06             |
| 60+                                   | 0.97        | 0.89 – 1.06             |
| DM                                    | 1.05        | 0.95 – 1.17             |
| HTN                                   | 1.02        | 0.93 – 1.11             |
| CAD                                   | 1.03        | 0.93 – 1.15             |
| PVD                                   | 1.17        | 0.99 – 1.30             |
| Sex (Male)                            | 1.03        | 0.98 – 1.09             |
| BMI (kg/m <sup>2</sup> )              |             |                         |
| <18.5                                 | 1.05        | 0.88 – 1.27             |
| 18.5-24.99                            | Ref         | -                       |
| 24.5-29.99                            | 1.22        | 1.14 – 1.30             |
| 30.0-34.99                            | 1.37        | 1.27 – 1.48             |
| >35.0                                 | 1.58        | 1.44 – 1.75             |
| Race                                  |             |                         |
| White                                 | Ref         | -                       |
| Black                                 | 1.05        | 0.98 – 1.12             |
| Other                                 | 1.00        | 0.92 – 1.08             |
| ESRD                                  |             |                         |
| GN                                    | Ref         | -                       |
| DM                                    | 1.17        | 1.04 – 1.32             |
| PCKD                                  | 1.03        | 0.93 – 1.15             |
| Other                                 | 1.06        | 0.99 – 1.14             |
| Dialysis vintage >1 year (v. <1 year) | 1.04        | 0.97 – 1.12             |
| Prior Kidney Transplant               | 1.29        | 1.18 – 1.40             |
| <b>Transplant Factors</b>             |             |                         |
| Era after 2009 (v. before)            | 1.03        | 0.96 – 1.10             |
| Cold Ischemic Time (h)                |             |                         |
| <12                                   | Ref         | -                       |
| 12-24                                 | 1.14        | 1.07 – 1.21             |
| >24                                   | 1.21        | 1.10 – 1.32             |
| Transplant Side (Right)               | 1.17        | 1.11 – 1.24             |
| ECD                                   | 1.07        | 0.96 – 1.19             |
| DCD                                   | 1.02        | 0.94 – 1.11             |

**Missing data:** Recipient HTN 7.5%, recipient CAD 10.6%, recipient PVD 3.2%, ESRD 0.6%, CIT 0.8%, donor HTN 0.5%, dialysis vintage 0.9%, donor BMI 0.002%, recipient BMI 0.3%. *Diabetes mellitus (DM), hypertension (HTN), body mass index (BMI), coronary artery disease (CAD), peripheral vascular disease (PVD), end-stage renal disease (ESRD), glomerulonephritis (GN), polycystic kidney disease (PCKD), warm ischemia time (WIT), cold ischemia time (CIT), expanded criteria donor (ECD), donation after cardiac death (DCD).*
